# Supplementary material for: Porous carbons from sustainable sources and mild activation for targeted high-performance CO2 capture and storage
Source: Royal Society of Chemistry journal article supplement (doi:10.1039/d0ma00449a), 2020-01-01
Supplement: d0ma00449a1.pdf [file d0ma00449a1.pdf]

## ***Supporting Information***

### **Porous carbons from sustainable and mild activation for targeted high-performance CO<sub>2</sub> capture and storage**

Abdulsalam M. Aljumialy,<sup>1,2</sup> and Robert Mokaya<sup>1,\*</sup>

<sup>1</sup>School of Chemistry, University of Nottingham, University Park, Nottingham NG7 2RD, U. K.

<sup>2</sup>Department of Chemistry, College of Science, University of Anbar, Anbar, Iraq

*E-mail: r.mokaya@nottingham.ac.uk (R. Mokaya)*

Table S1. Yield and elemental analysis of carbons prepared at PO/precursor ratio of 2 from sawdust hydrochar (SD), polypyrrole (Ppy), and pre-mixed precursors containing sawdust hydrochar and polypyrrole (Ppy-SD).

| Sample          | Yield<br>(wt%) | Elemental composition (wt%) |     |      |      |
|-----------------|----------------|-----------------------------|-----|------|------|
|                 |                | C                           | H   | N    | O    |
| SD2600          | 43             | 78.9                        | 1.4 | 0.7  | 19.0 |
| SD2700          | 41             | 81.1                        | 0.2 | 0.2  | 18.5 |
| SD2800          | 33             | 87.7                        | 0   | 0.1  | 12.2 |
| SD2900          | 21             | 90.7                        | 0   | 0.2  | 9.1  |
| Ppy-SD(1-2)2600 | 48             | 71.9                        | 1.9 | 5.6  | 20.6 |
| Ppy-SD(1-2)2700 | 27             | 74.0                        | 1.8 | 2.9  | 21.3 |
| Ppy-SD(1-2)2800 | 31             | 85.0                        | 0.1 | 0.3  | 14.6 |
| Ppy-SD(1-2)2900 | 17             | 91.4                        | 0.0 | 0.4  | 8.2  |
| Ppy-SD(1-1)2600 | 52             | 68.4                        | 1.9 | 8.0  | 21.7 |
| Ppy-SD(1-1)2700 | 39             | 80.2                        | 0.3 | 2.0  | 17.5 |
| Ppy-SD(1-1)2800 | 31             | 88.9                        | 0.0 | 0.6  | 10.5 |
| Ppy-SD(1-1)2900 | 18             | 91.4                        | 0.0 | 0.7  | 7.9  |
| Ppy-SD(2-1)2600 | 54             | 66.3                        | 2.1 | 9.4  | 22.2 |
| Ppy-SD(2-1)2700 | 39             | 73.7                        | 0.3 | 2.3  | 23.7 |
| Ppy-SD(2-1)2800 | 32             | 86.5                        | 0.0 | 0.5  | 13.0 |
| Ppy-SD(2-1)2900 | 19             | 90.1                        | 0.0 | 0.5  | 9.4  |
| Ppy2600         | 62             | 63.6                        | 1.7 | 12.2 | 22.5 |
| Ppy2700         | 43             | 77.6                        | 0.8 | 4.0  | 17.6 |
| Ppy2800         | 31             | 88.5                        | 0.0 | 0.9  | 10.6 |
| Ppy2900         | 24             | 91.9                        | 0.0 | 1.2  | 6.9  |

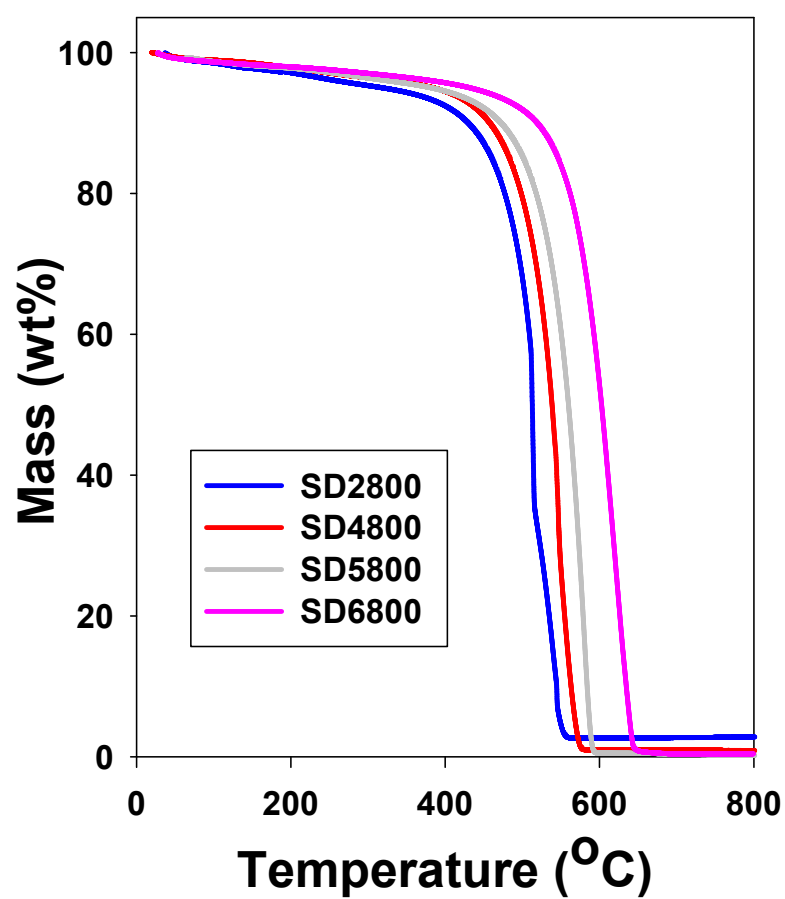

**Supporting Figure S1.** Thermogravimetric analysis of samples activated at of 800 °C and PO/SD ratio of 2, 4, 5 and 6.

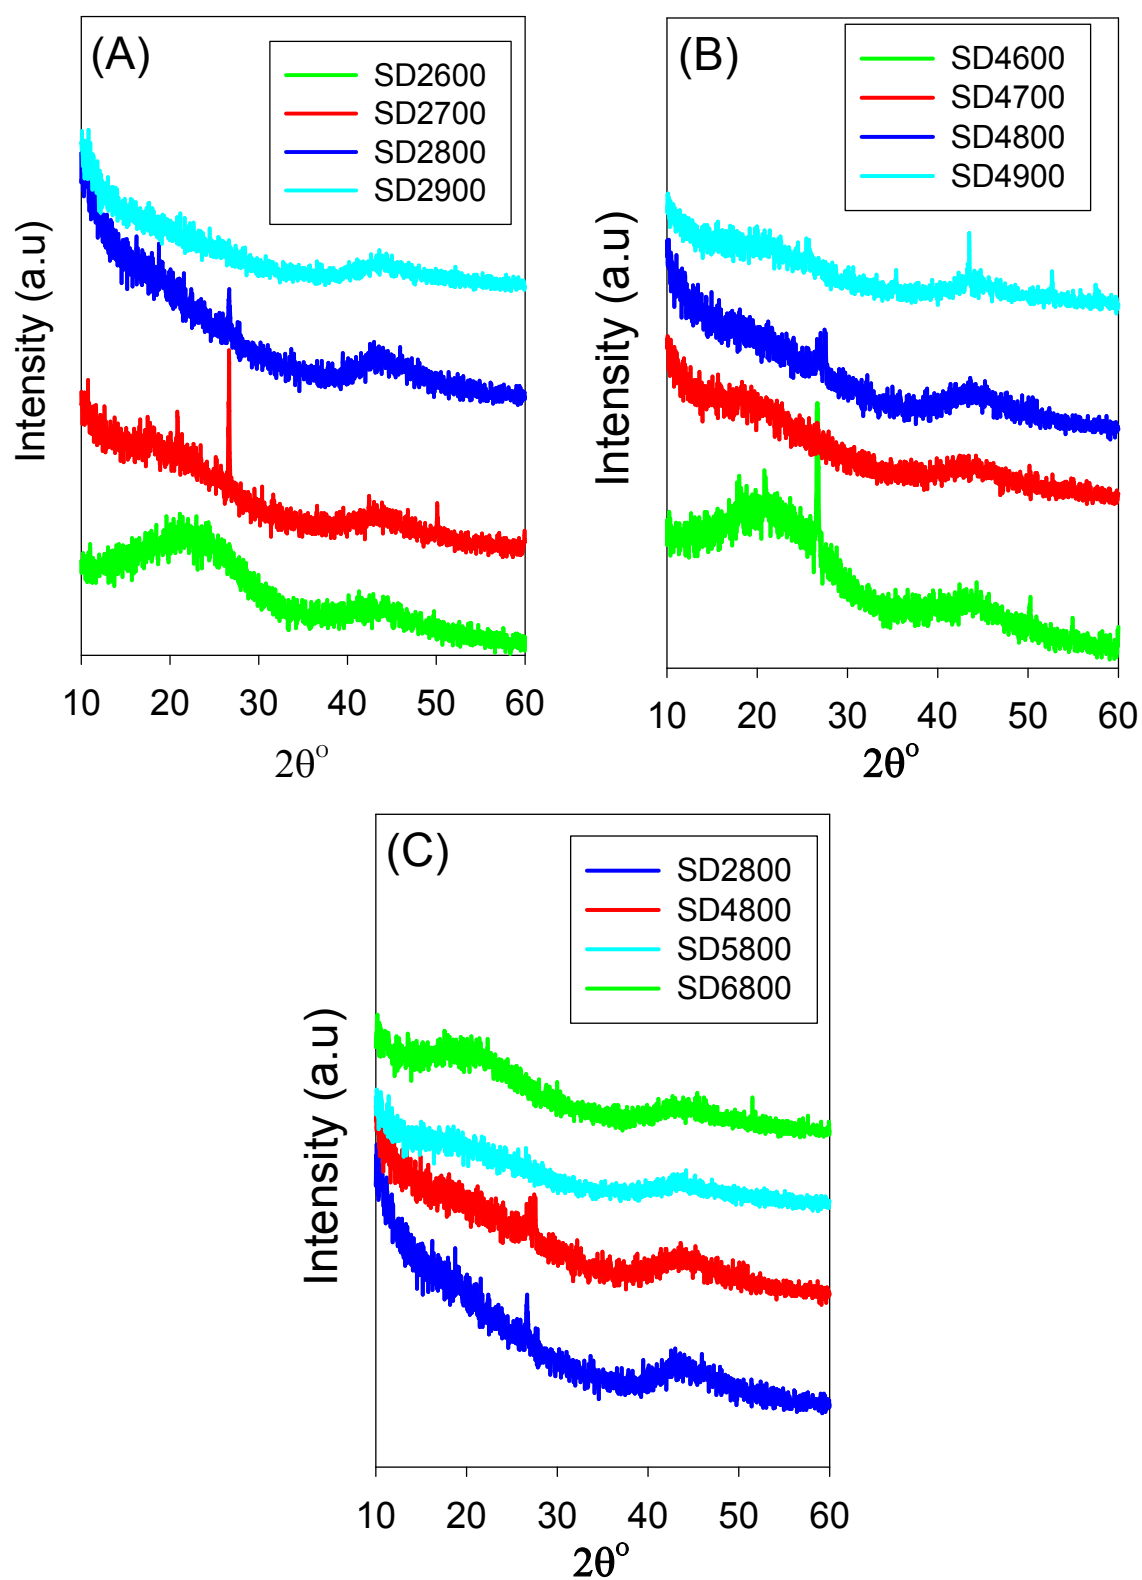

**Supporting Figure S2.** Powder XRD patterns of (A) samples activated at PO/SD ratio of 2, (B) samples activated at PO/SD ratio of 4 and (C) activated at 800 °C at various PO/SD ratios.

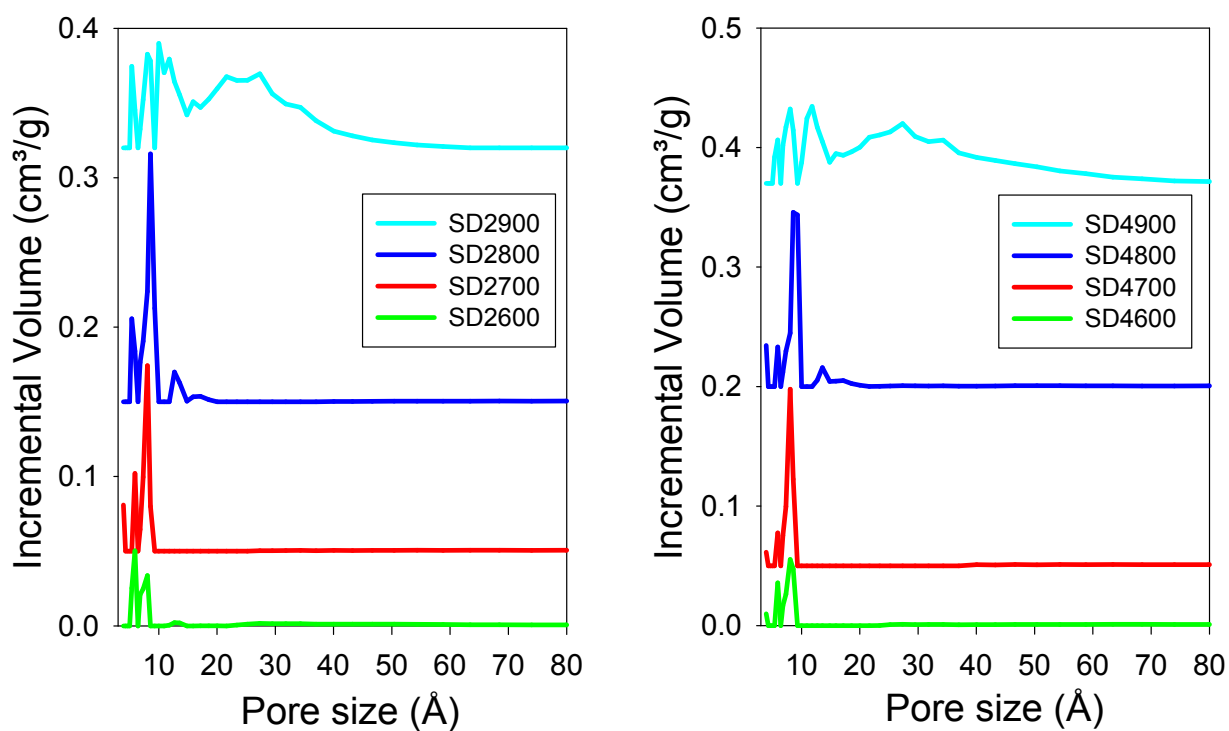

**Supporting Figure S3.** Pore size distributions curves for carbon samples activated at temperatures between 600 and 900 °C, and PO/SD ratio of 2 or 4.

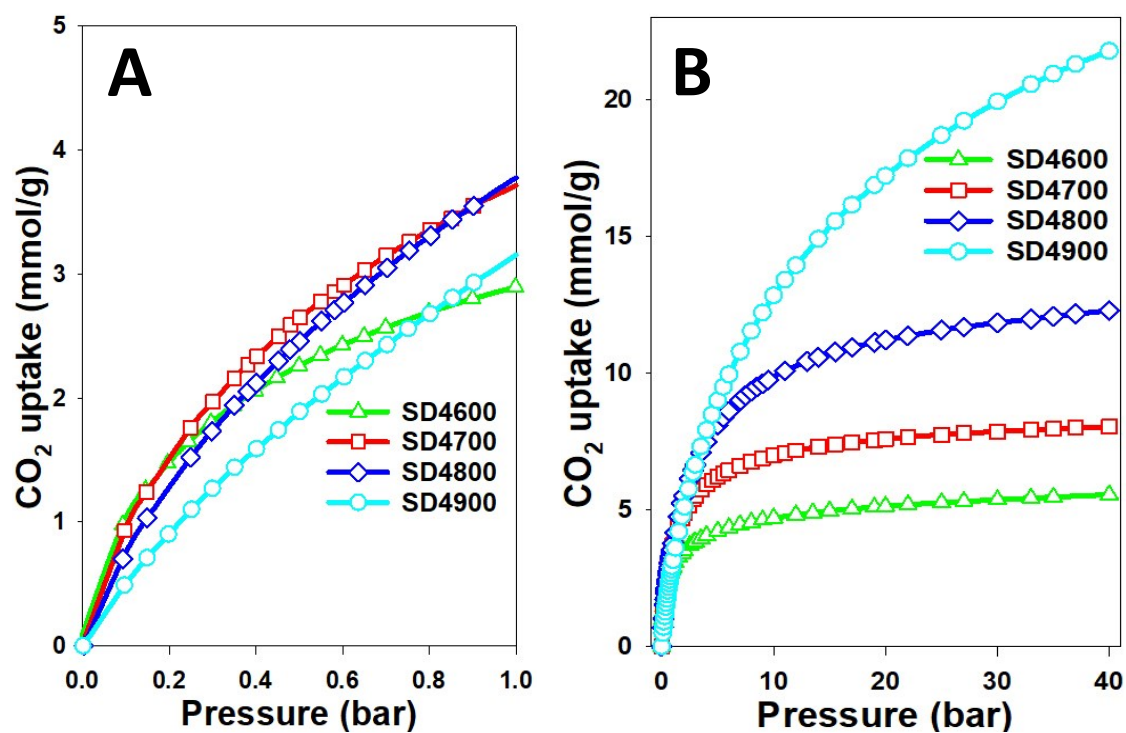

**Supporting Figure S4.** Carbon dioxide uptake isotherms at 25 °C and pressure of (A) 0 – 1 bar and (B) 0 – 40 bar of carbons activated at between 600 and 900 °C and PO/SD ratio of 4.

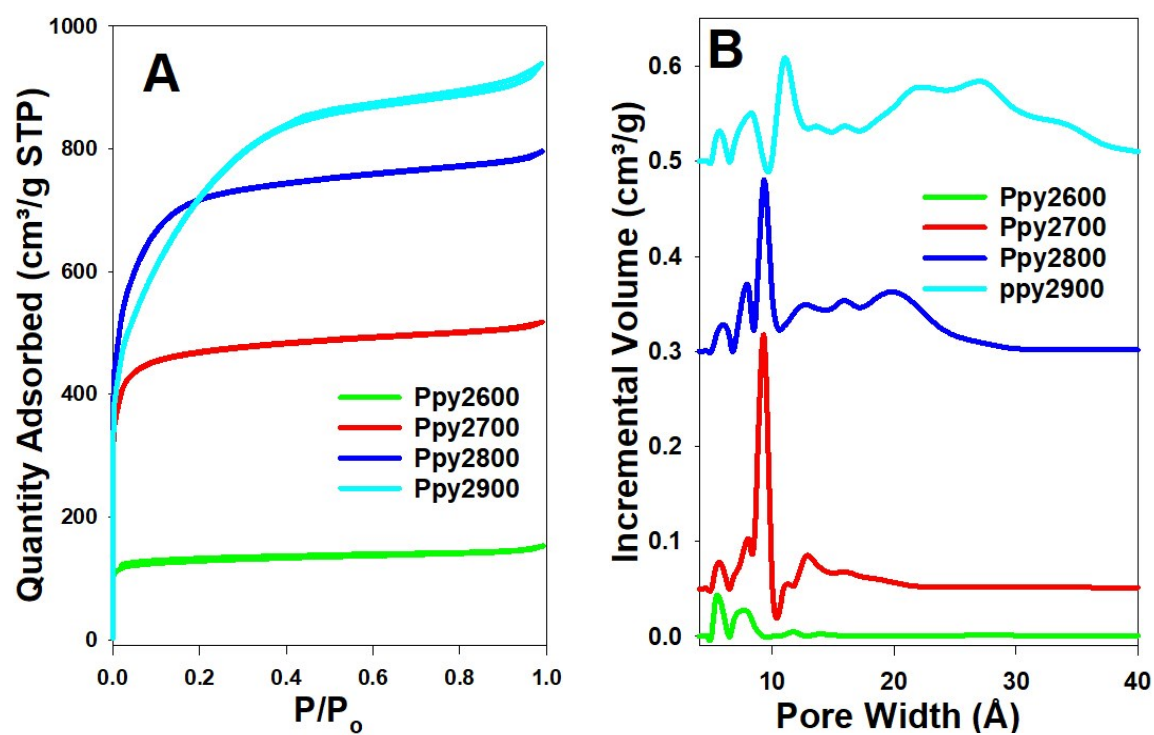

**Supporting Figure S5.** Nitrogen sorption isotherms (A) and pore size distribution curves (B) for polypyrrole (Ppy) derived carbons activated at 600 to 900 °C and PO/Ppy ratio of 2.

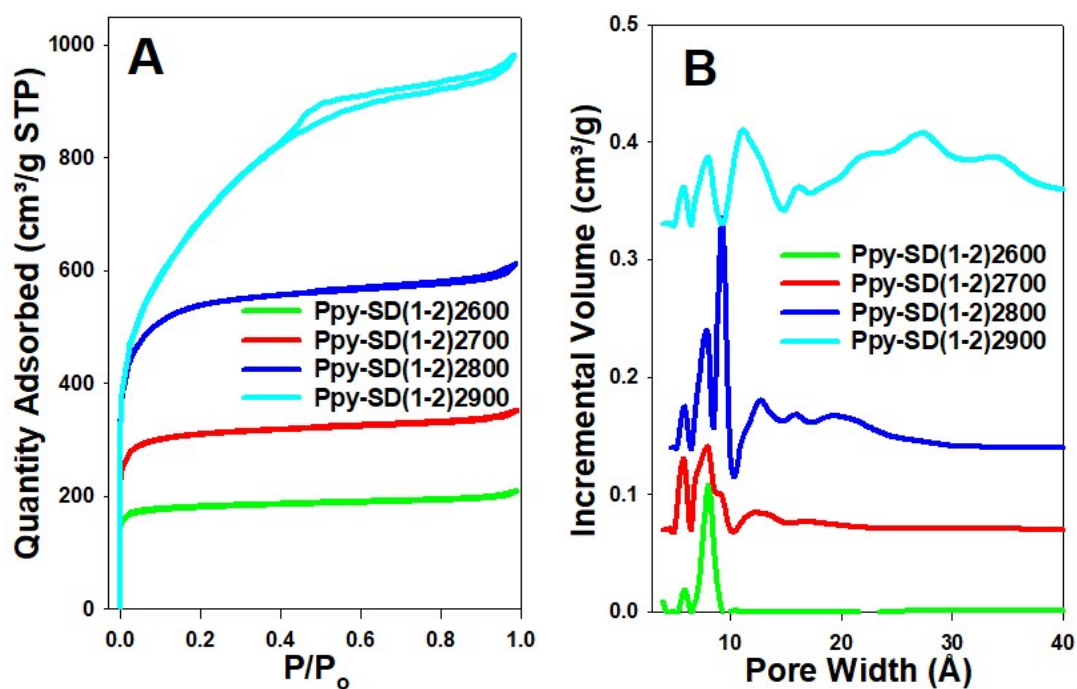

**Supporting Figure S6.** Nitrogen sorption isotherms (A) and pore size distribution curves (B) for carbons derived from pre-mixed precursors containing polypyrrole (Ppy) and sawdust hydrochar (SD) at Ppy:SD ratio of 1:2. The carbons were prepared at activation temperature of between 600 and 900 °C, and PO/precursor ratio of 2.



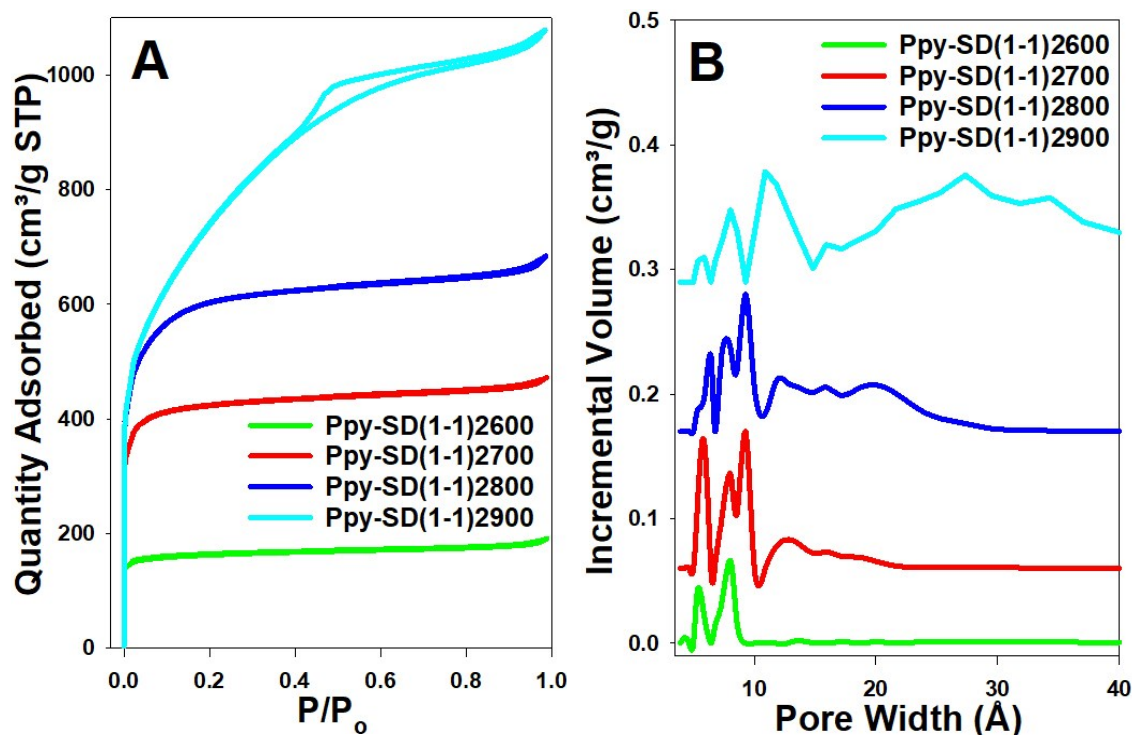

**Supporting Figure S7.** Nitrogen sorption isotherms (A) and pore size distribution curves (B) for carbons derived from pre-mixed precursors containing polypyrrole (Ppy) and sawdust hydrochar (SD) at Ppy:SD ratio of 1:1. The carbons were prepared at activation temperature of between 600 and 900 °C, and PO/precursor ratio of 2.

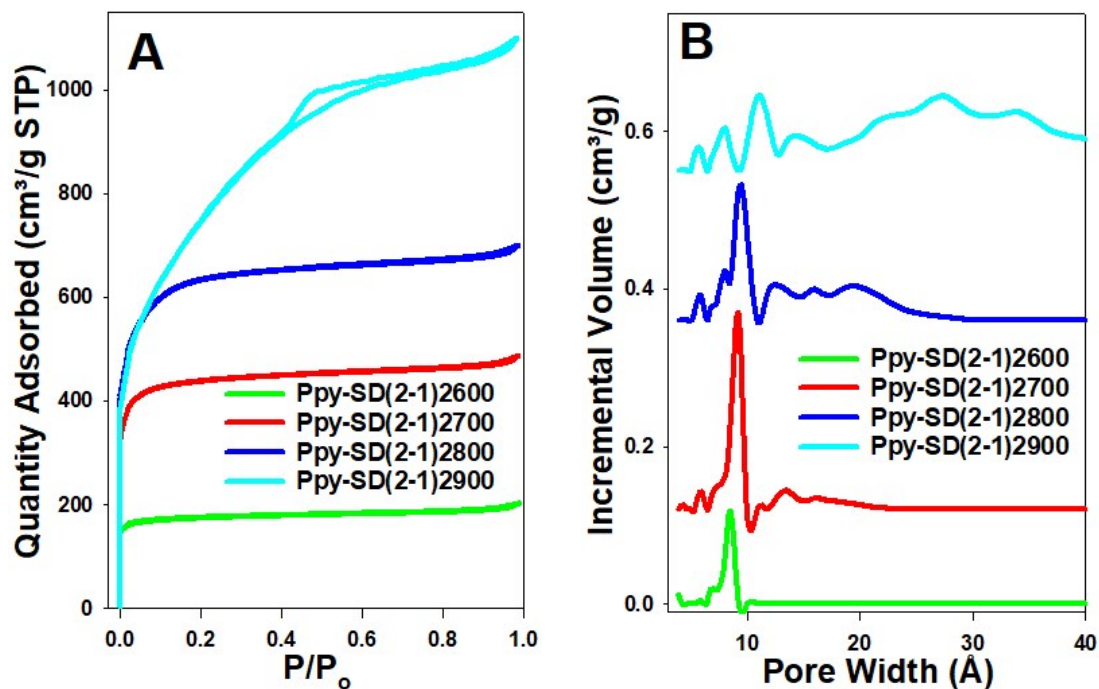

**Supporting Figure S8.** Nitrogen sorption isotherms (A) and pore size distribution curves (B) for carbons derived from pre-mixed precursors containing polypyrrole (Ppy) and sawdust hydrochar (SD) at Ppy:SD ratio of 2:1. The carbons were prepared at activation temperature of between 600 and 900 °C, and PO/precursor ratio of 2.

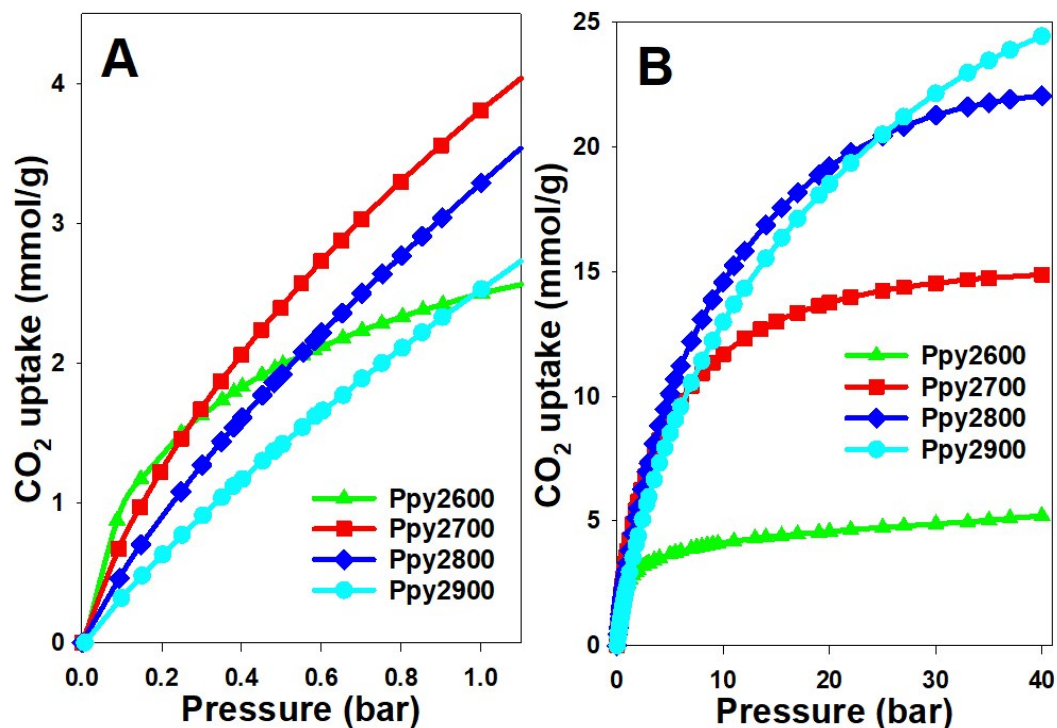

**Supporting Figure S9.** Carbon dioxide uptake isotherms at 25 °C and pressure of (A) 0 – 1 bar and (B) 0 – 40 bar of polypyrrole (Ppy) derived carbons activated at between 600 and 900 °C, and PO/Ppy ratio of 2.

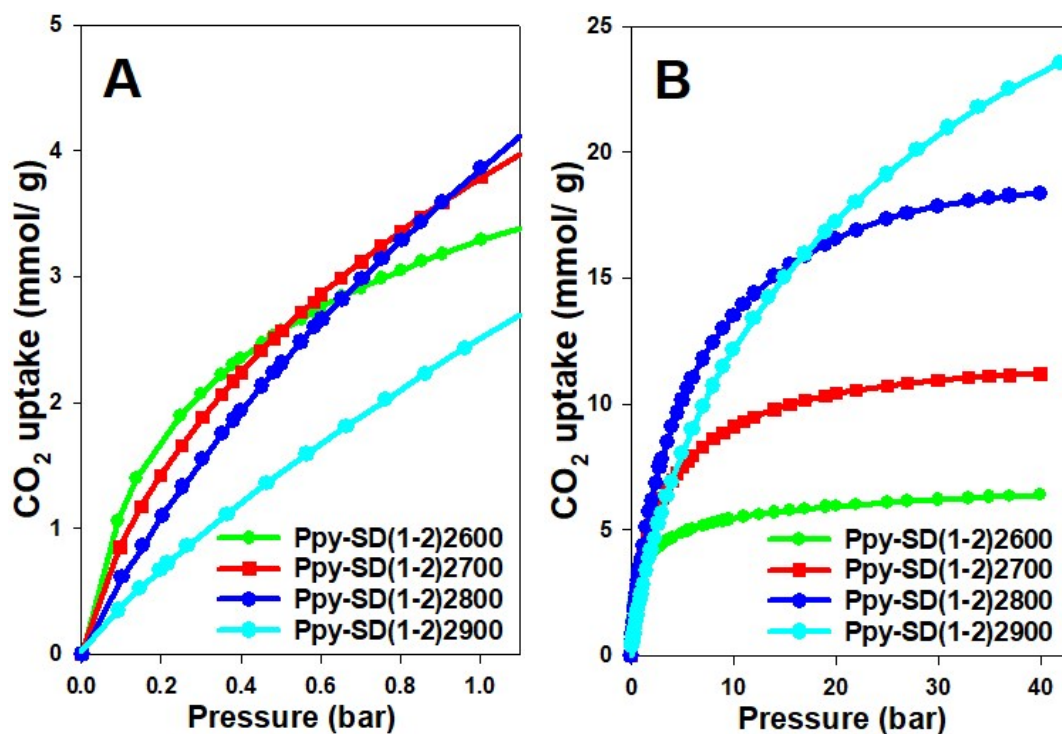

**Supporting Figure S10.** Carbon dioxide uptake isotherms at 25 °C and pressure of (A) 0 – 1 bar and (B) 0 – 40 bar of carbons derived from pre-mixed precursors containing polypyrrole (Ppy) and sawdust hydrochar (SD) at Ppy:SD ratio of 1:2. The carbons were prepared at activation temperature of between 600 and 900 °C, and PO/precursor ratio of 2.

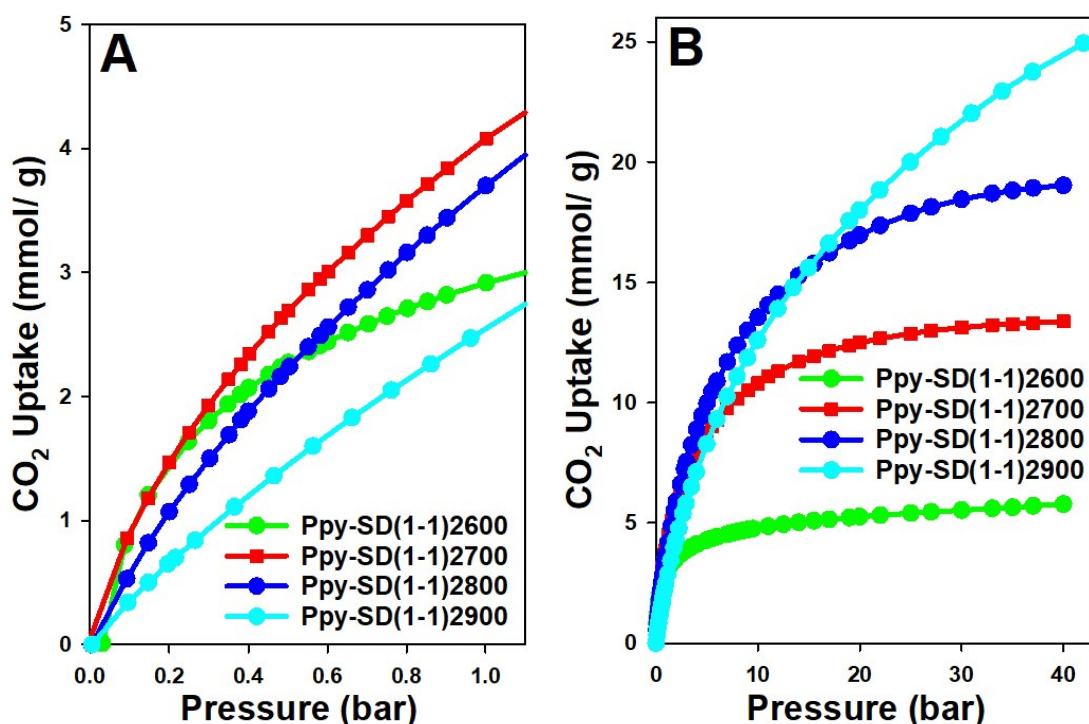

**Supporting Figure S11.** Carbon dioxide uptake isotherms at 25 °C and pressure of (A) 0 – 1 bar and (B) 0 – 40 bar of carbons derived from pre-mixed precursors containing polypyrrole (Ppy) and sawdust hydrochar (SD) at Ppy:SD ratio of 1:1. The carbons were prepared at activation temperature of between 600 and 900 °C, and PO/precursor ratio of 2.

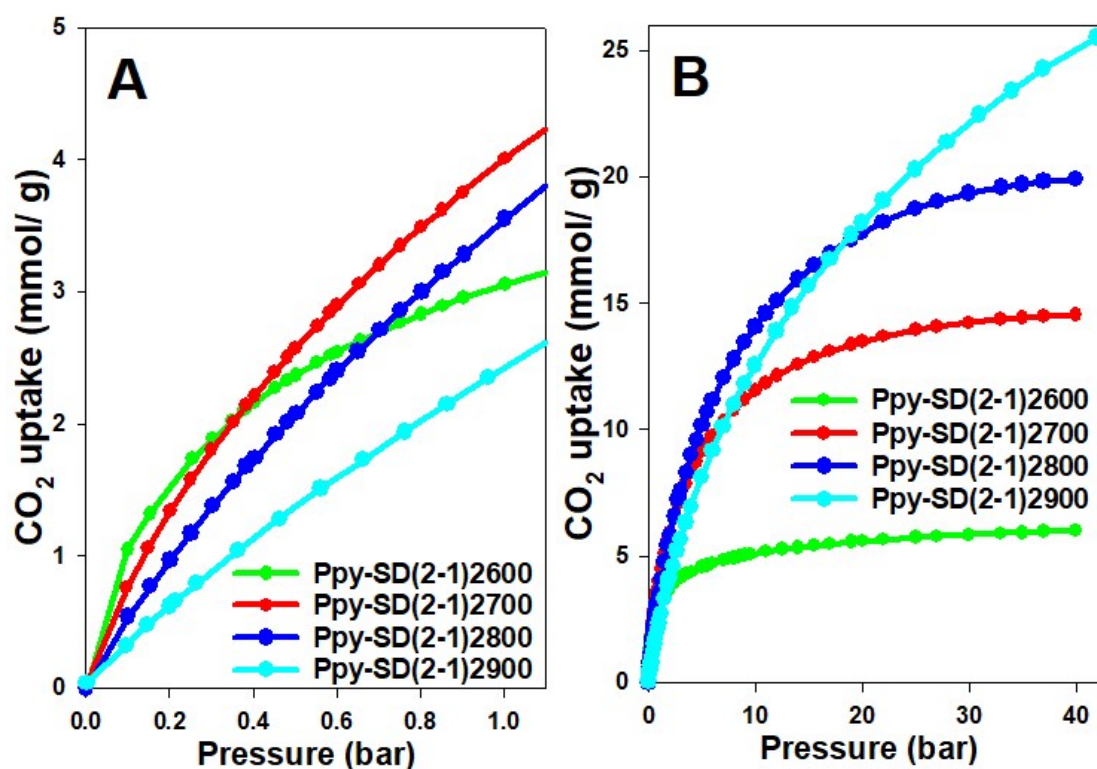

**Supporting Figure S12.** Carbon dioxide uptake isotherms at 25 °C and pressure of (A) 0 – 1 bar and (B) 0 – 40 bar of carbons derived from pre-mixed precursors containing polypyrrole (Ppy) and sawdust hydrochar (SD) at Ppy:SD ratio of 2:1. The carbons were prepared at activation temperature of between 600 and 900 °C, and PO/precursor ratio of 2.

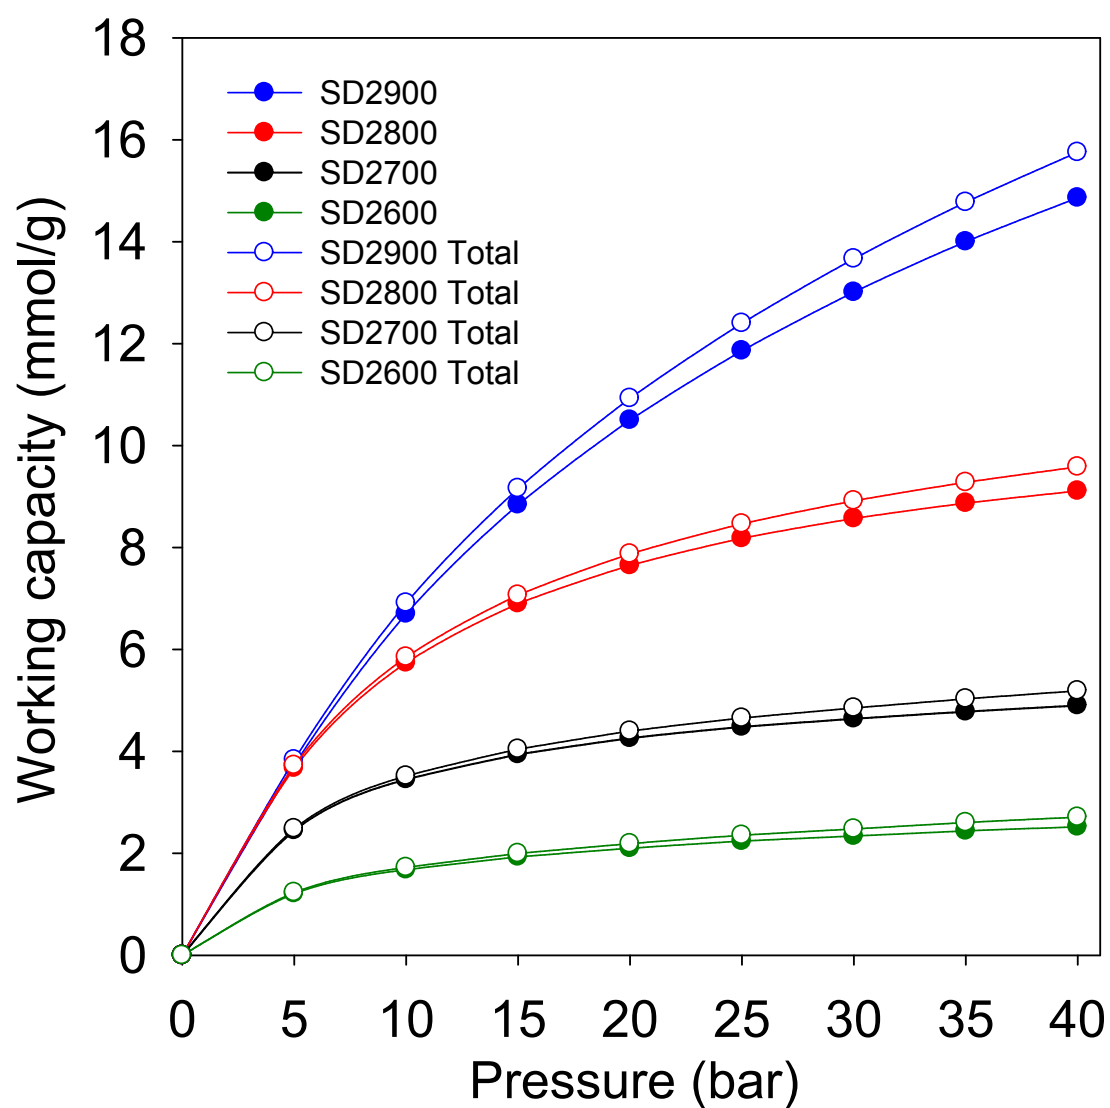

**Supporting Figure S13.** Excess and total pressure swing adsorption (PSA) CO<sub>2</sub> working capacity for a 60:40 H<sub>2</sub>/CO<sub>2</sub> mixture for sawdust hydrochar (SD) derived carbons activated at between 600 and 900 °C, and PO/SD ratio of 2.

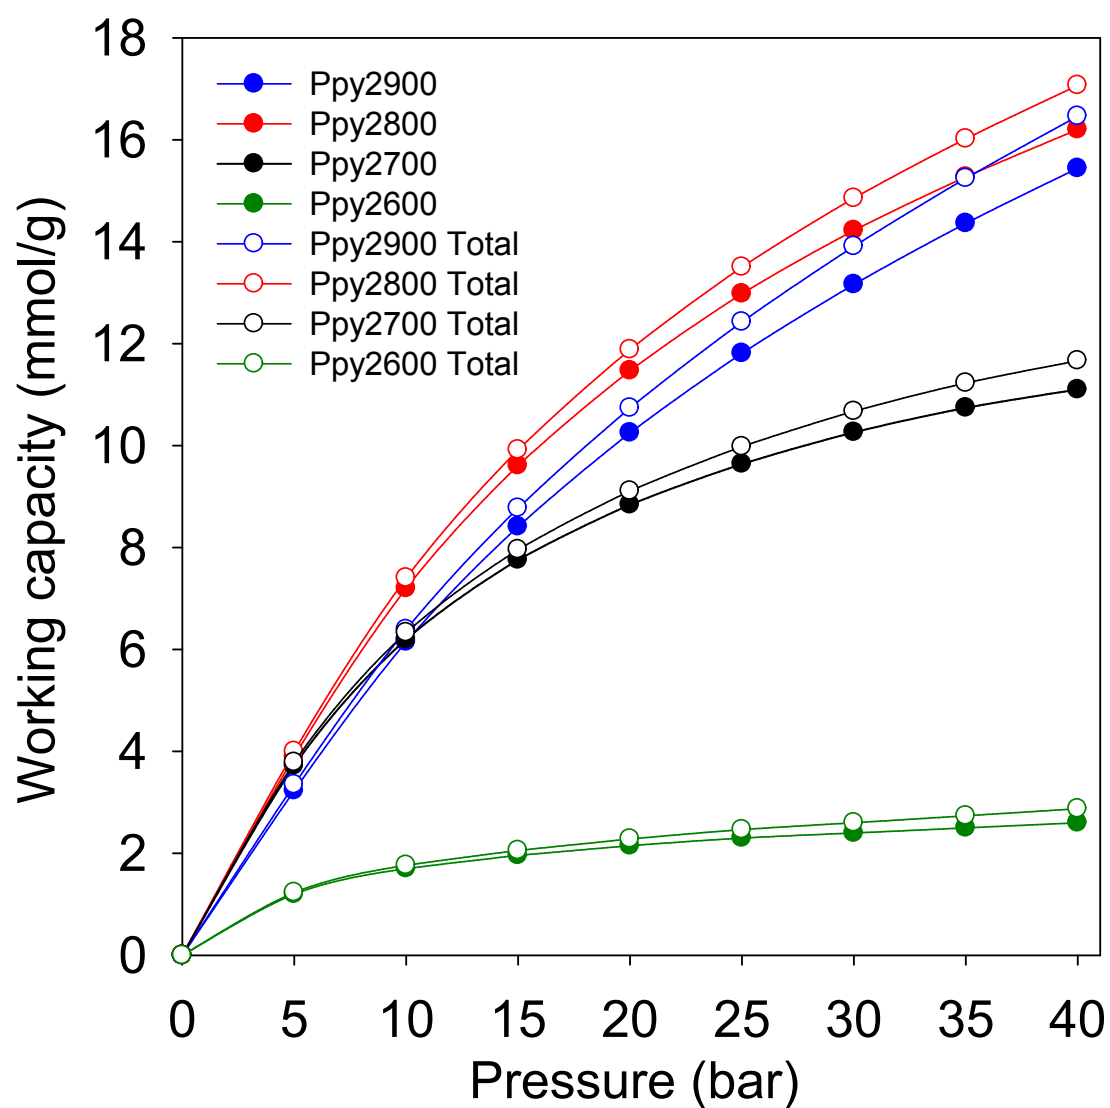

**Supporting Figure S14.** Excess and total pressure swing adsorption (PSA) CO<sub>2</sub> working capacity for a 60:40 H<sub>2</sub>/CO<sub>2</sub> mixture for polypyrrole (Ppy) derived carbons activated at between 600 and 900 °C, and PO/SD ratio of 2



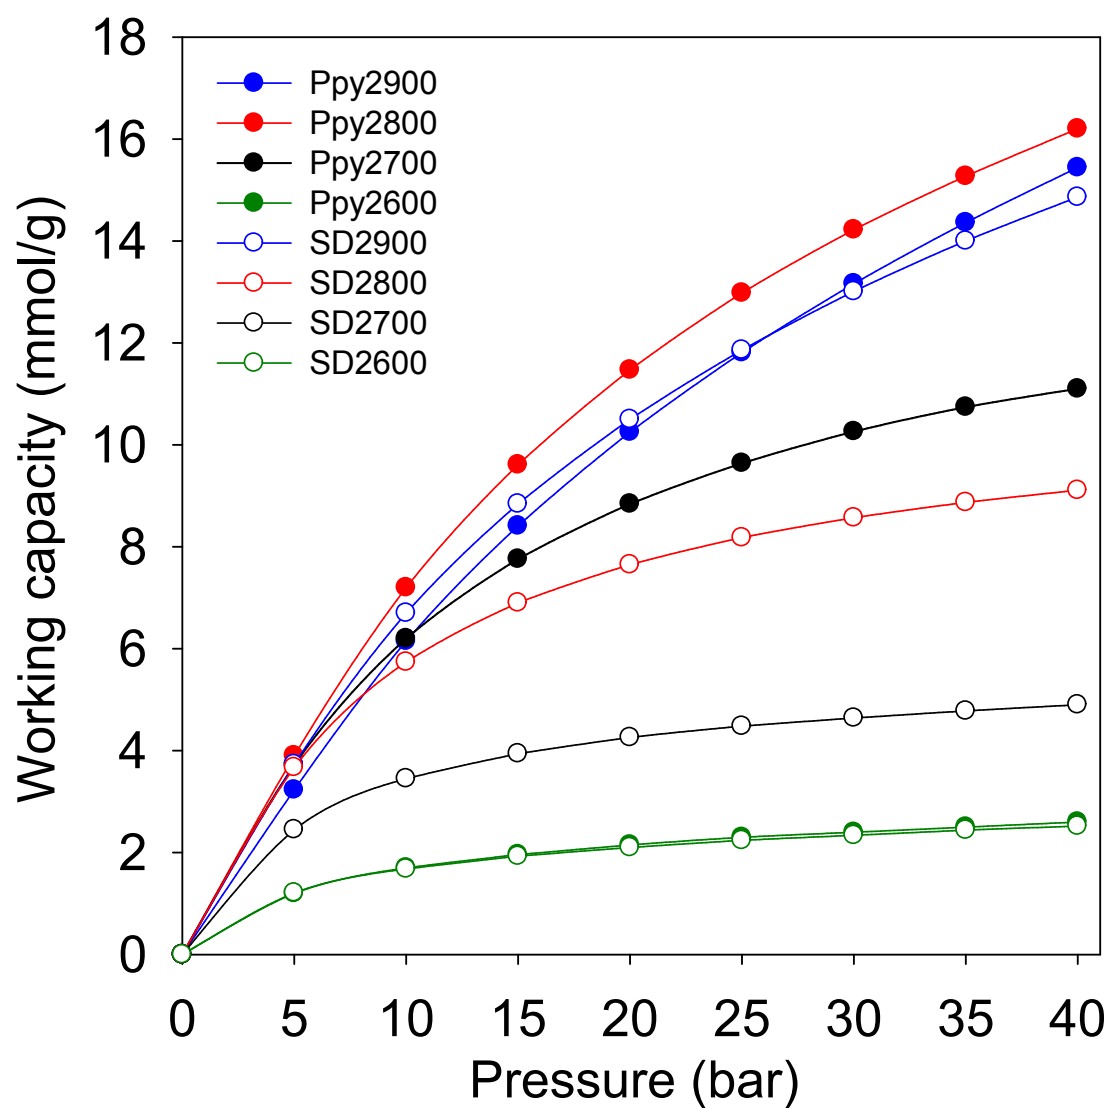

**Supporting Figure S15.** Excess pressure swing adsorption (PSA) CO<sub>2</sub> working capacity for a 60:40 H<sub>2</sub>/CO<sub>2</sub> mixture for sawdust hydrochar (SD) and polypyrrole (Ppy) derived carbons activated at between 600 and 900 °C, and PO/SD ratio of 2.

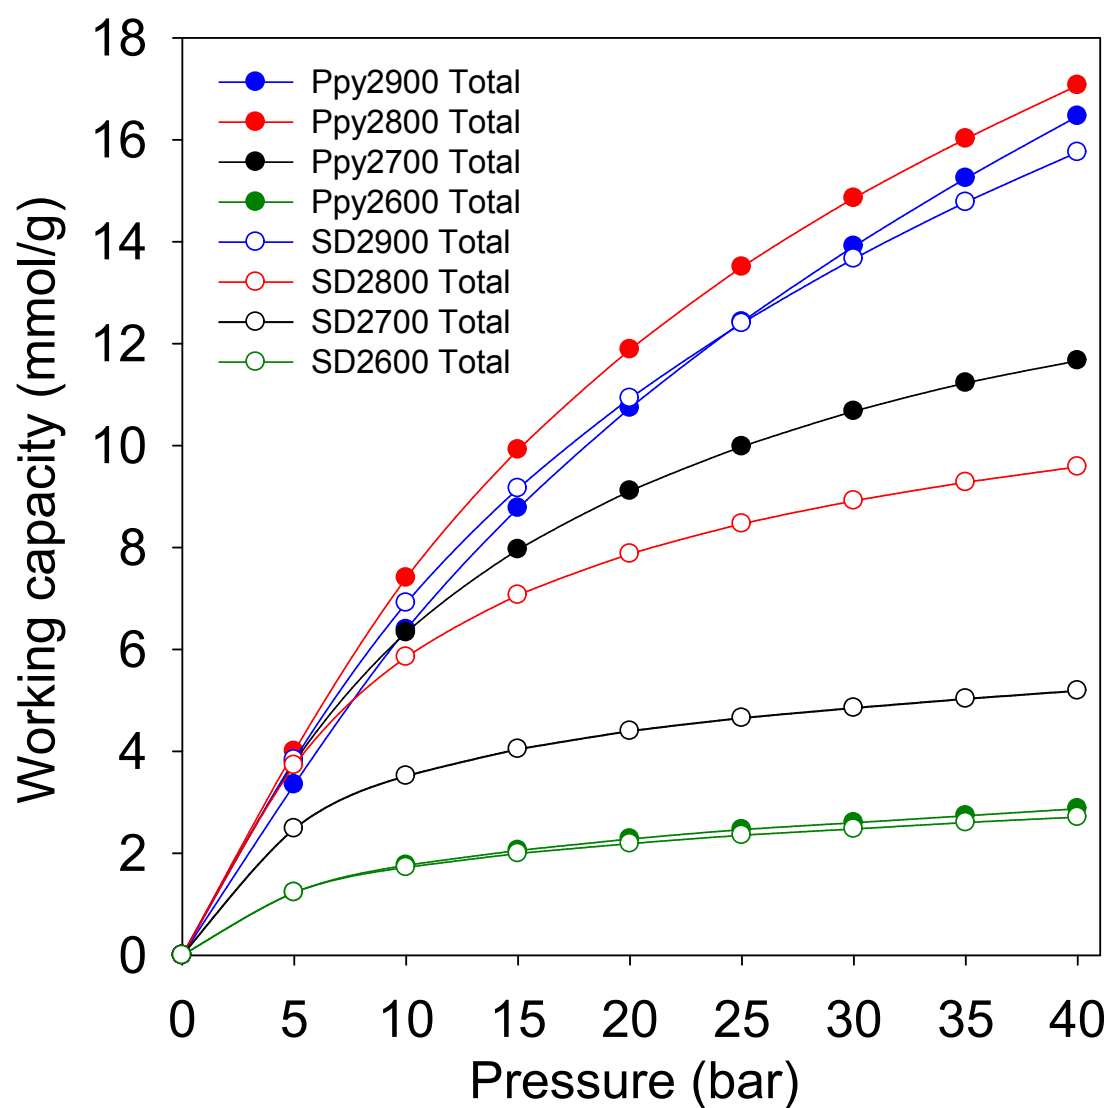

**Supporting Figure S16.** Excess pressure swing adsorption (PSA) CO<sub>2</sub> working capacity for a 60:40 H<sub>2</sub>/CO<sub>2</sub> mixture for sawdust hydrochar (SD) and polypyrrole (Ppy) derived carbons activated at between 600 and 900 °C, and PO/SD ratio of 2.

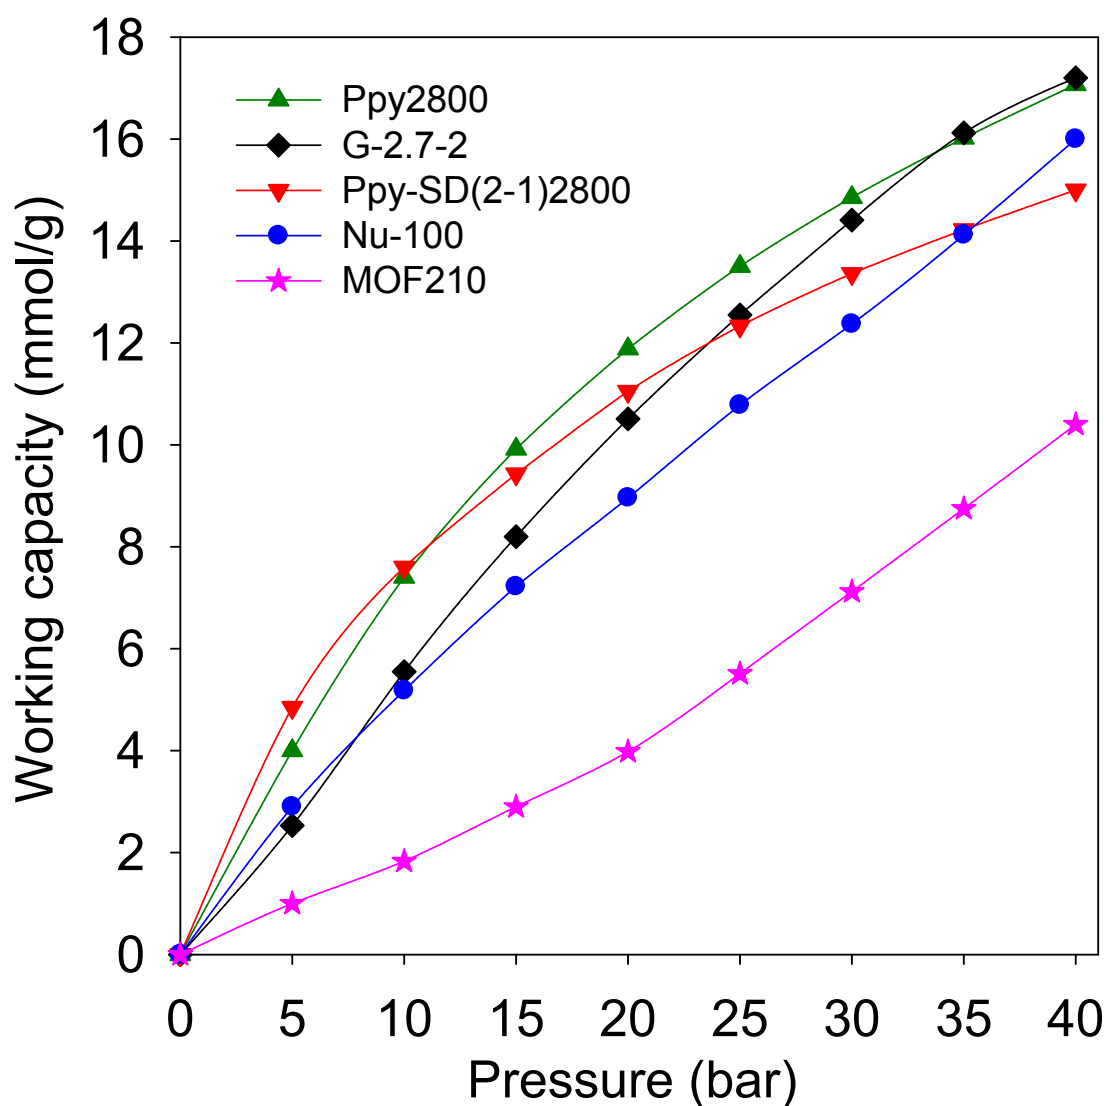

**Supporting Figure S17.** Excess pressure swing adsorption (PSA) CO<sub>2</sub> working capacity for a 60:40 H<sub>2</sub>/CO<sub>2</sub> mixture for potassium oxalate activated carbons (Ppy2800 and Ppy-SD(2-1)2800) compared to a porous carbon (G-2.7-2) and metal organic frameworks (NU-100 and MOF210) that have much higher surface area.

Data for G-2.7-2 is from the following reference: M. Sevilla, A. M. Al-Jumialy, A. B. Fuertes and R. Mokaya, *ACS Appl. Mater. Interfaces*, 2018, **10**, 1623.

Data for NU-100 and MOF210 is from the following reference: A. R. Millward and O. M. Yaghi, *J. Am. Chem. Soc.*, 2005, **127**, 17998.
